# Supplementary material for: Distinct Immune Response at 1 Year Post-COVID-19 According to Disease Severity
Source: PubMed Central journal article supplement (PMC8980227; doi:10.3389/fimmu.2022.830433), 2022-03-21

# Supplementary Figure S1

Spike protein

RBD

NC

M protein

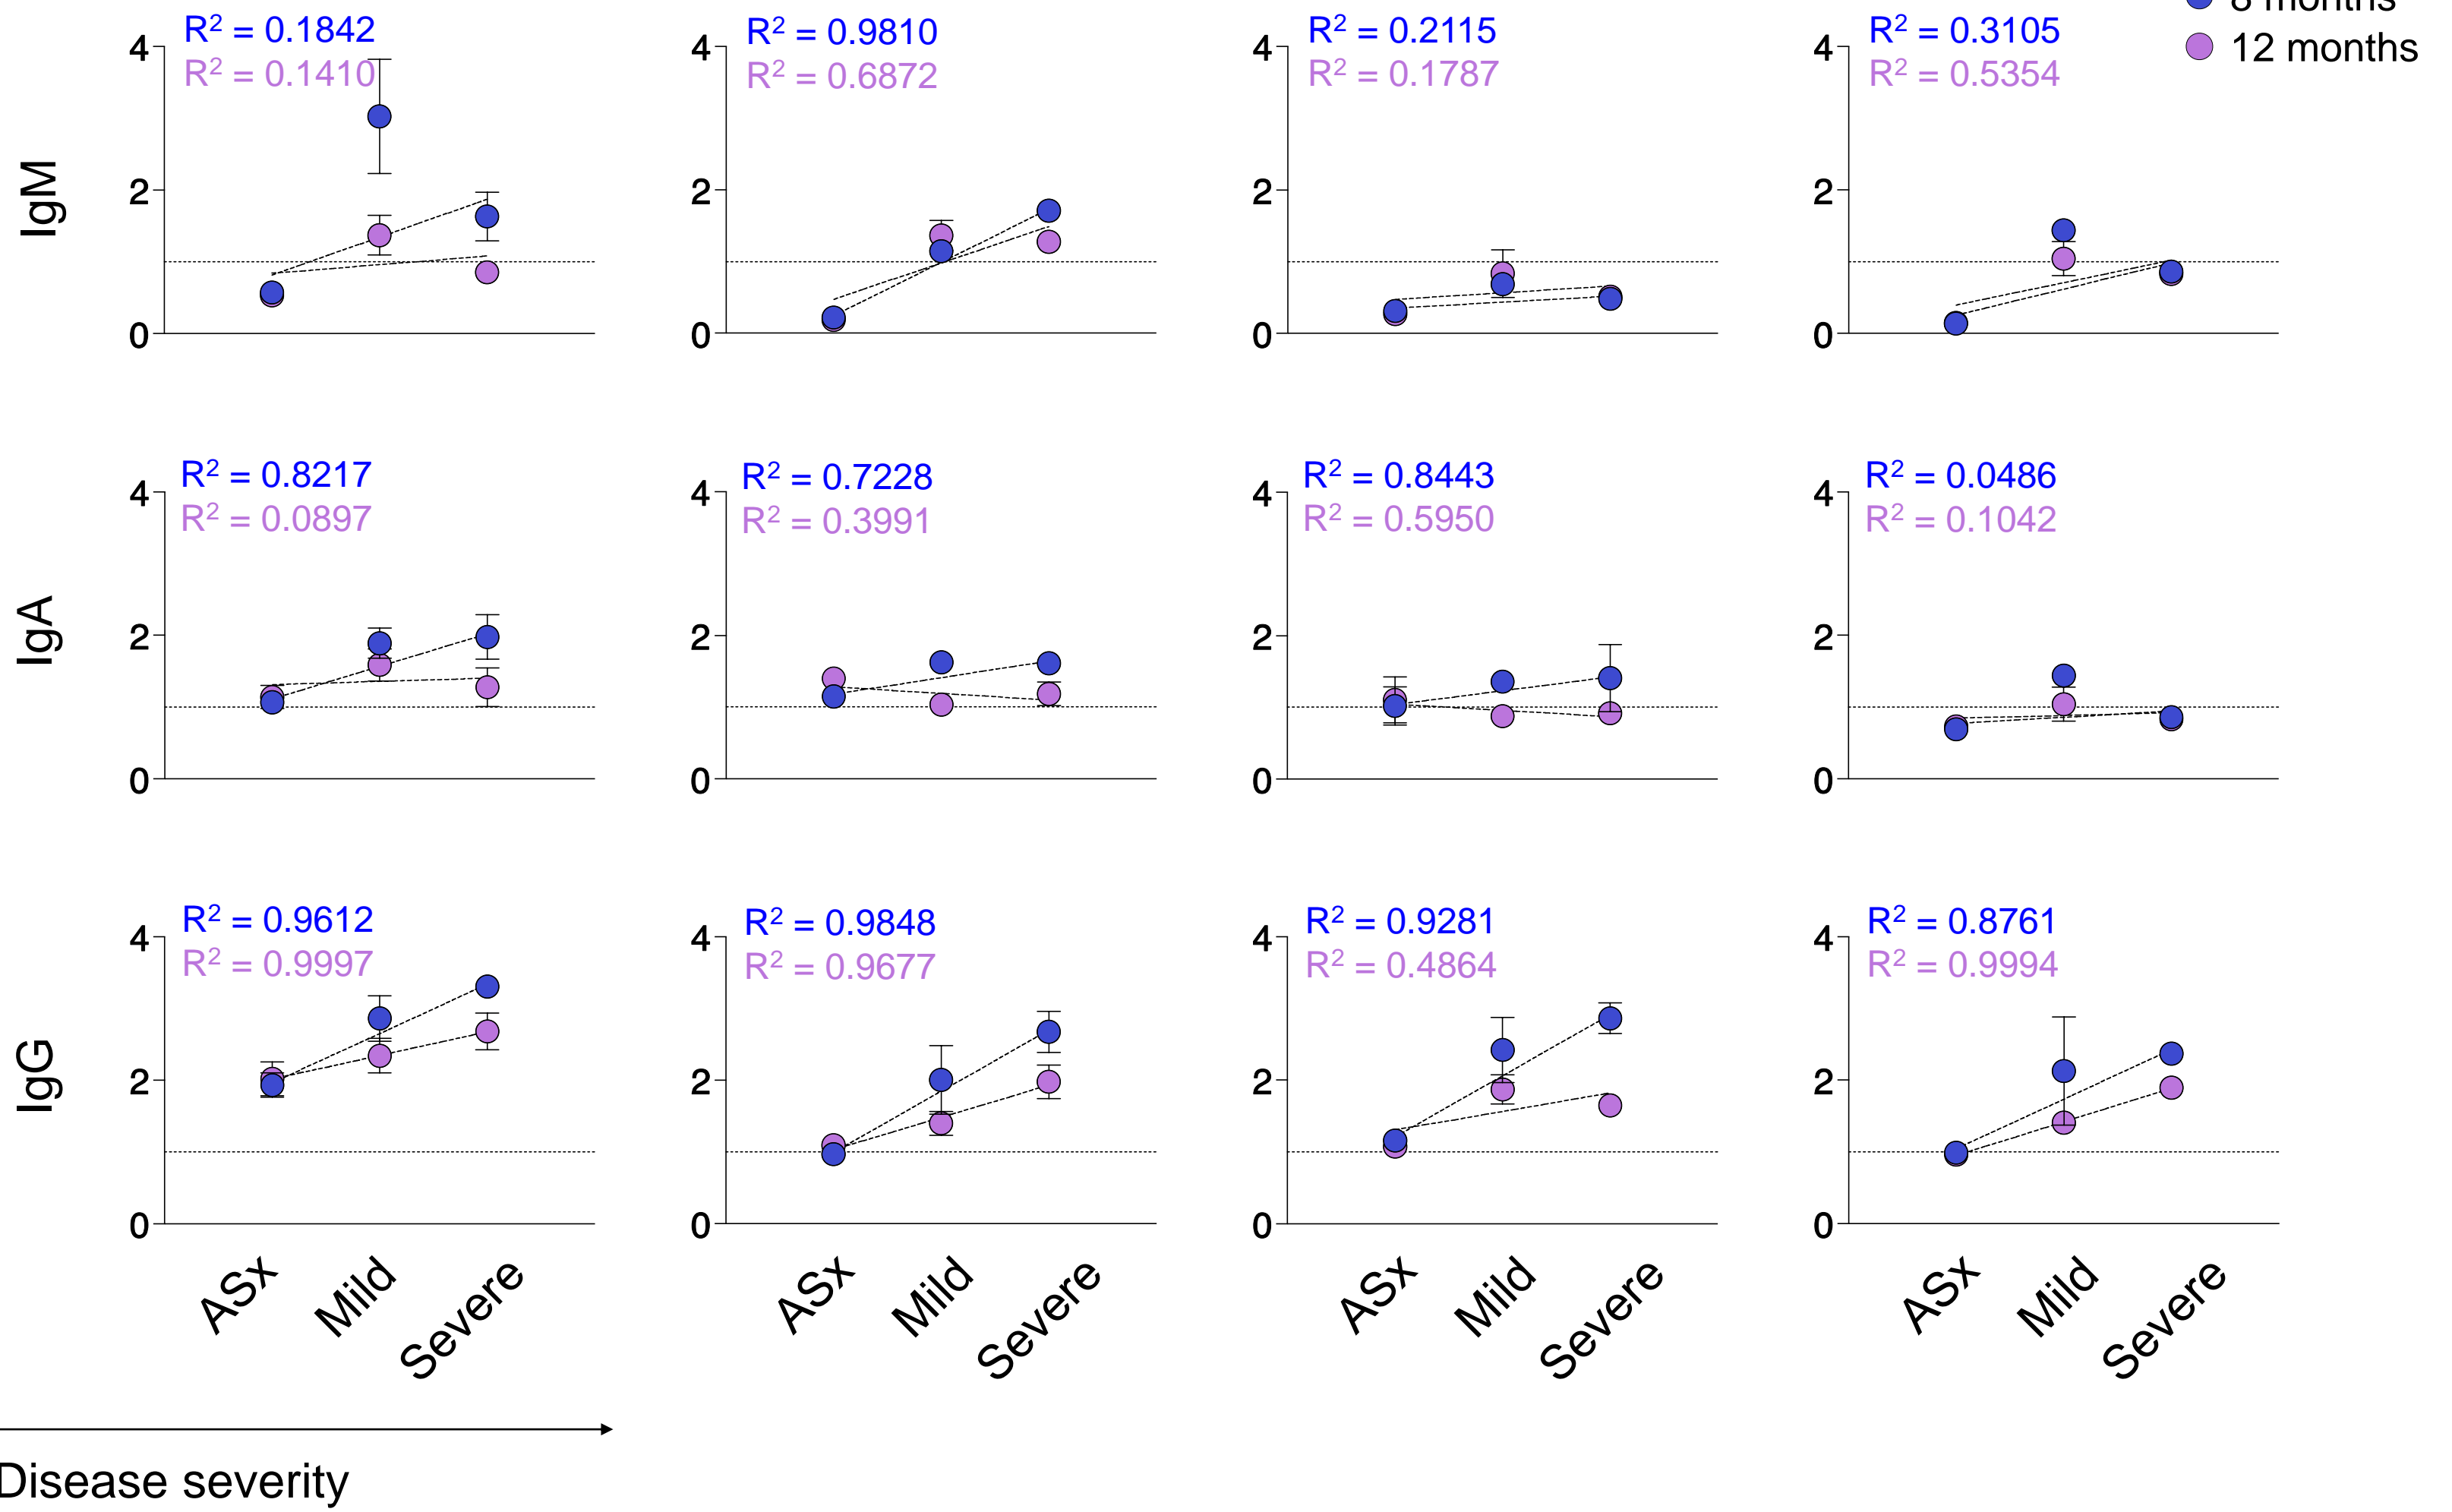

# Supplementary Figure S2

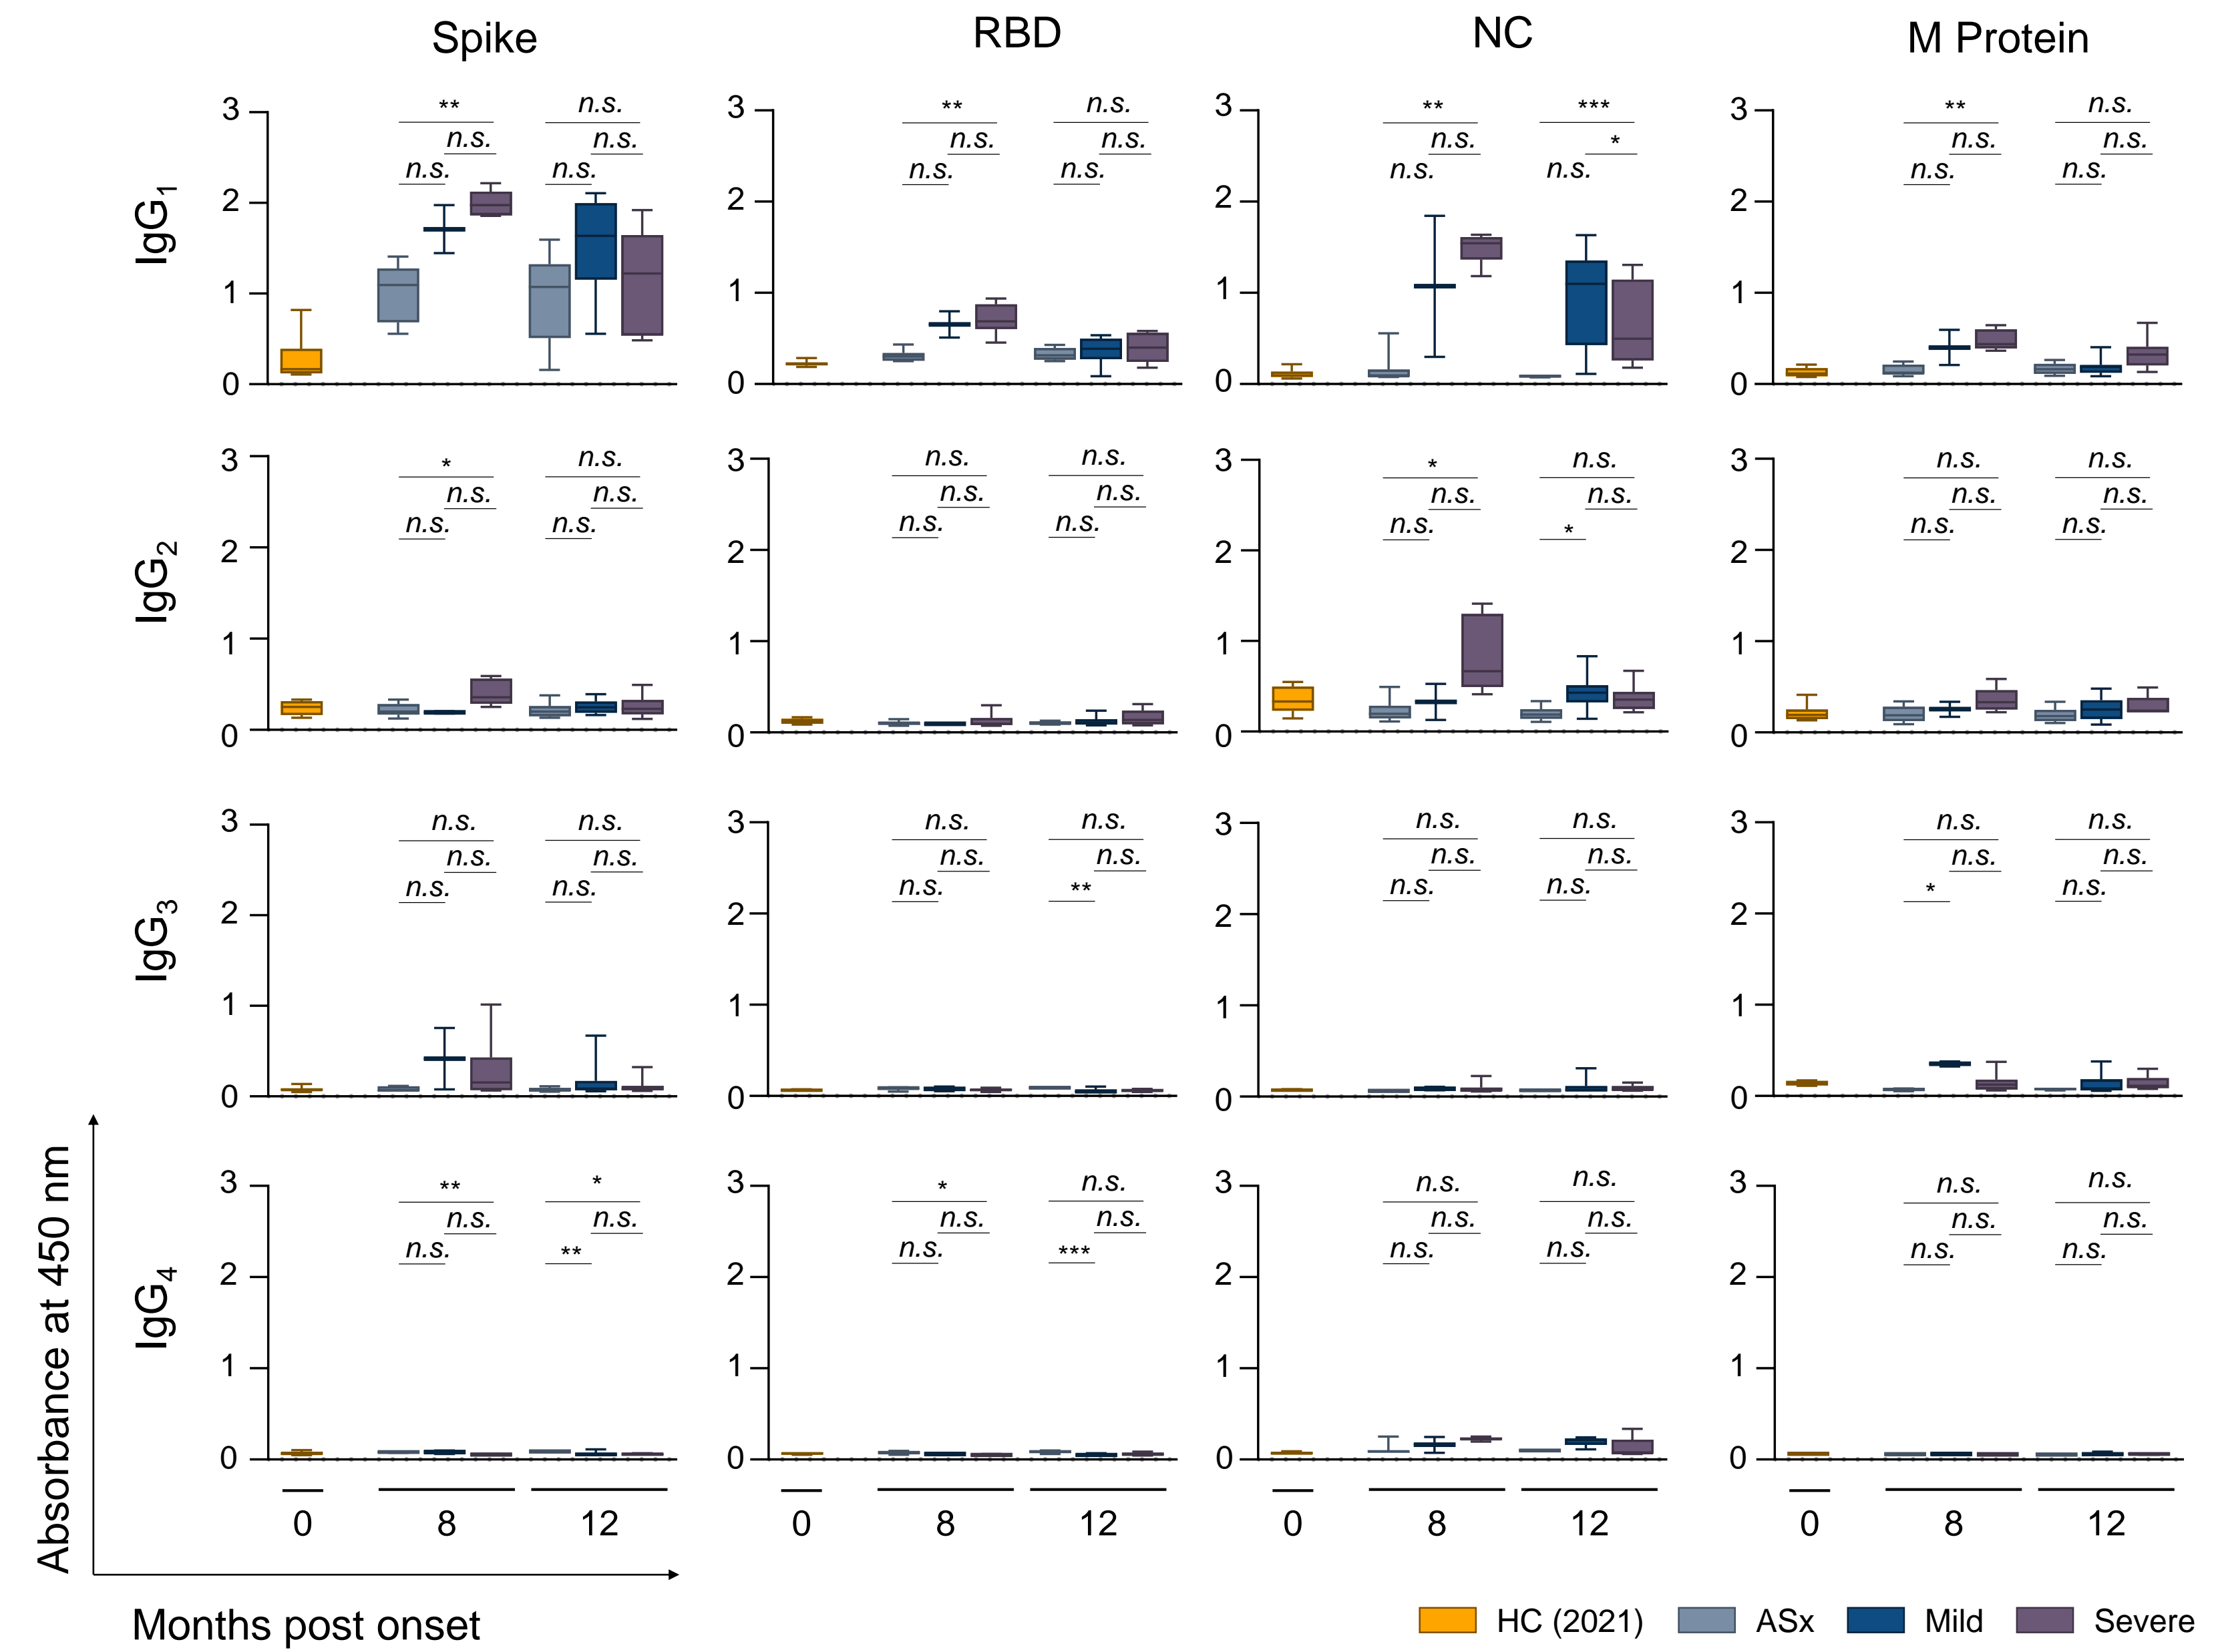

# Supplementary Figure S3

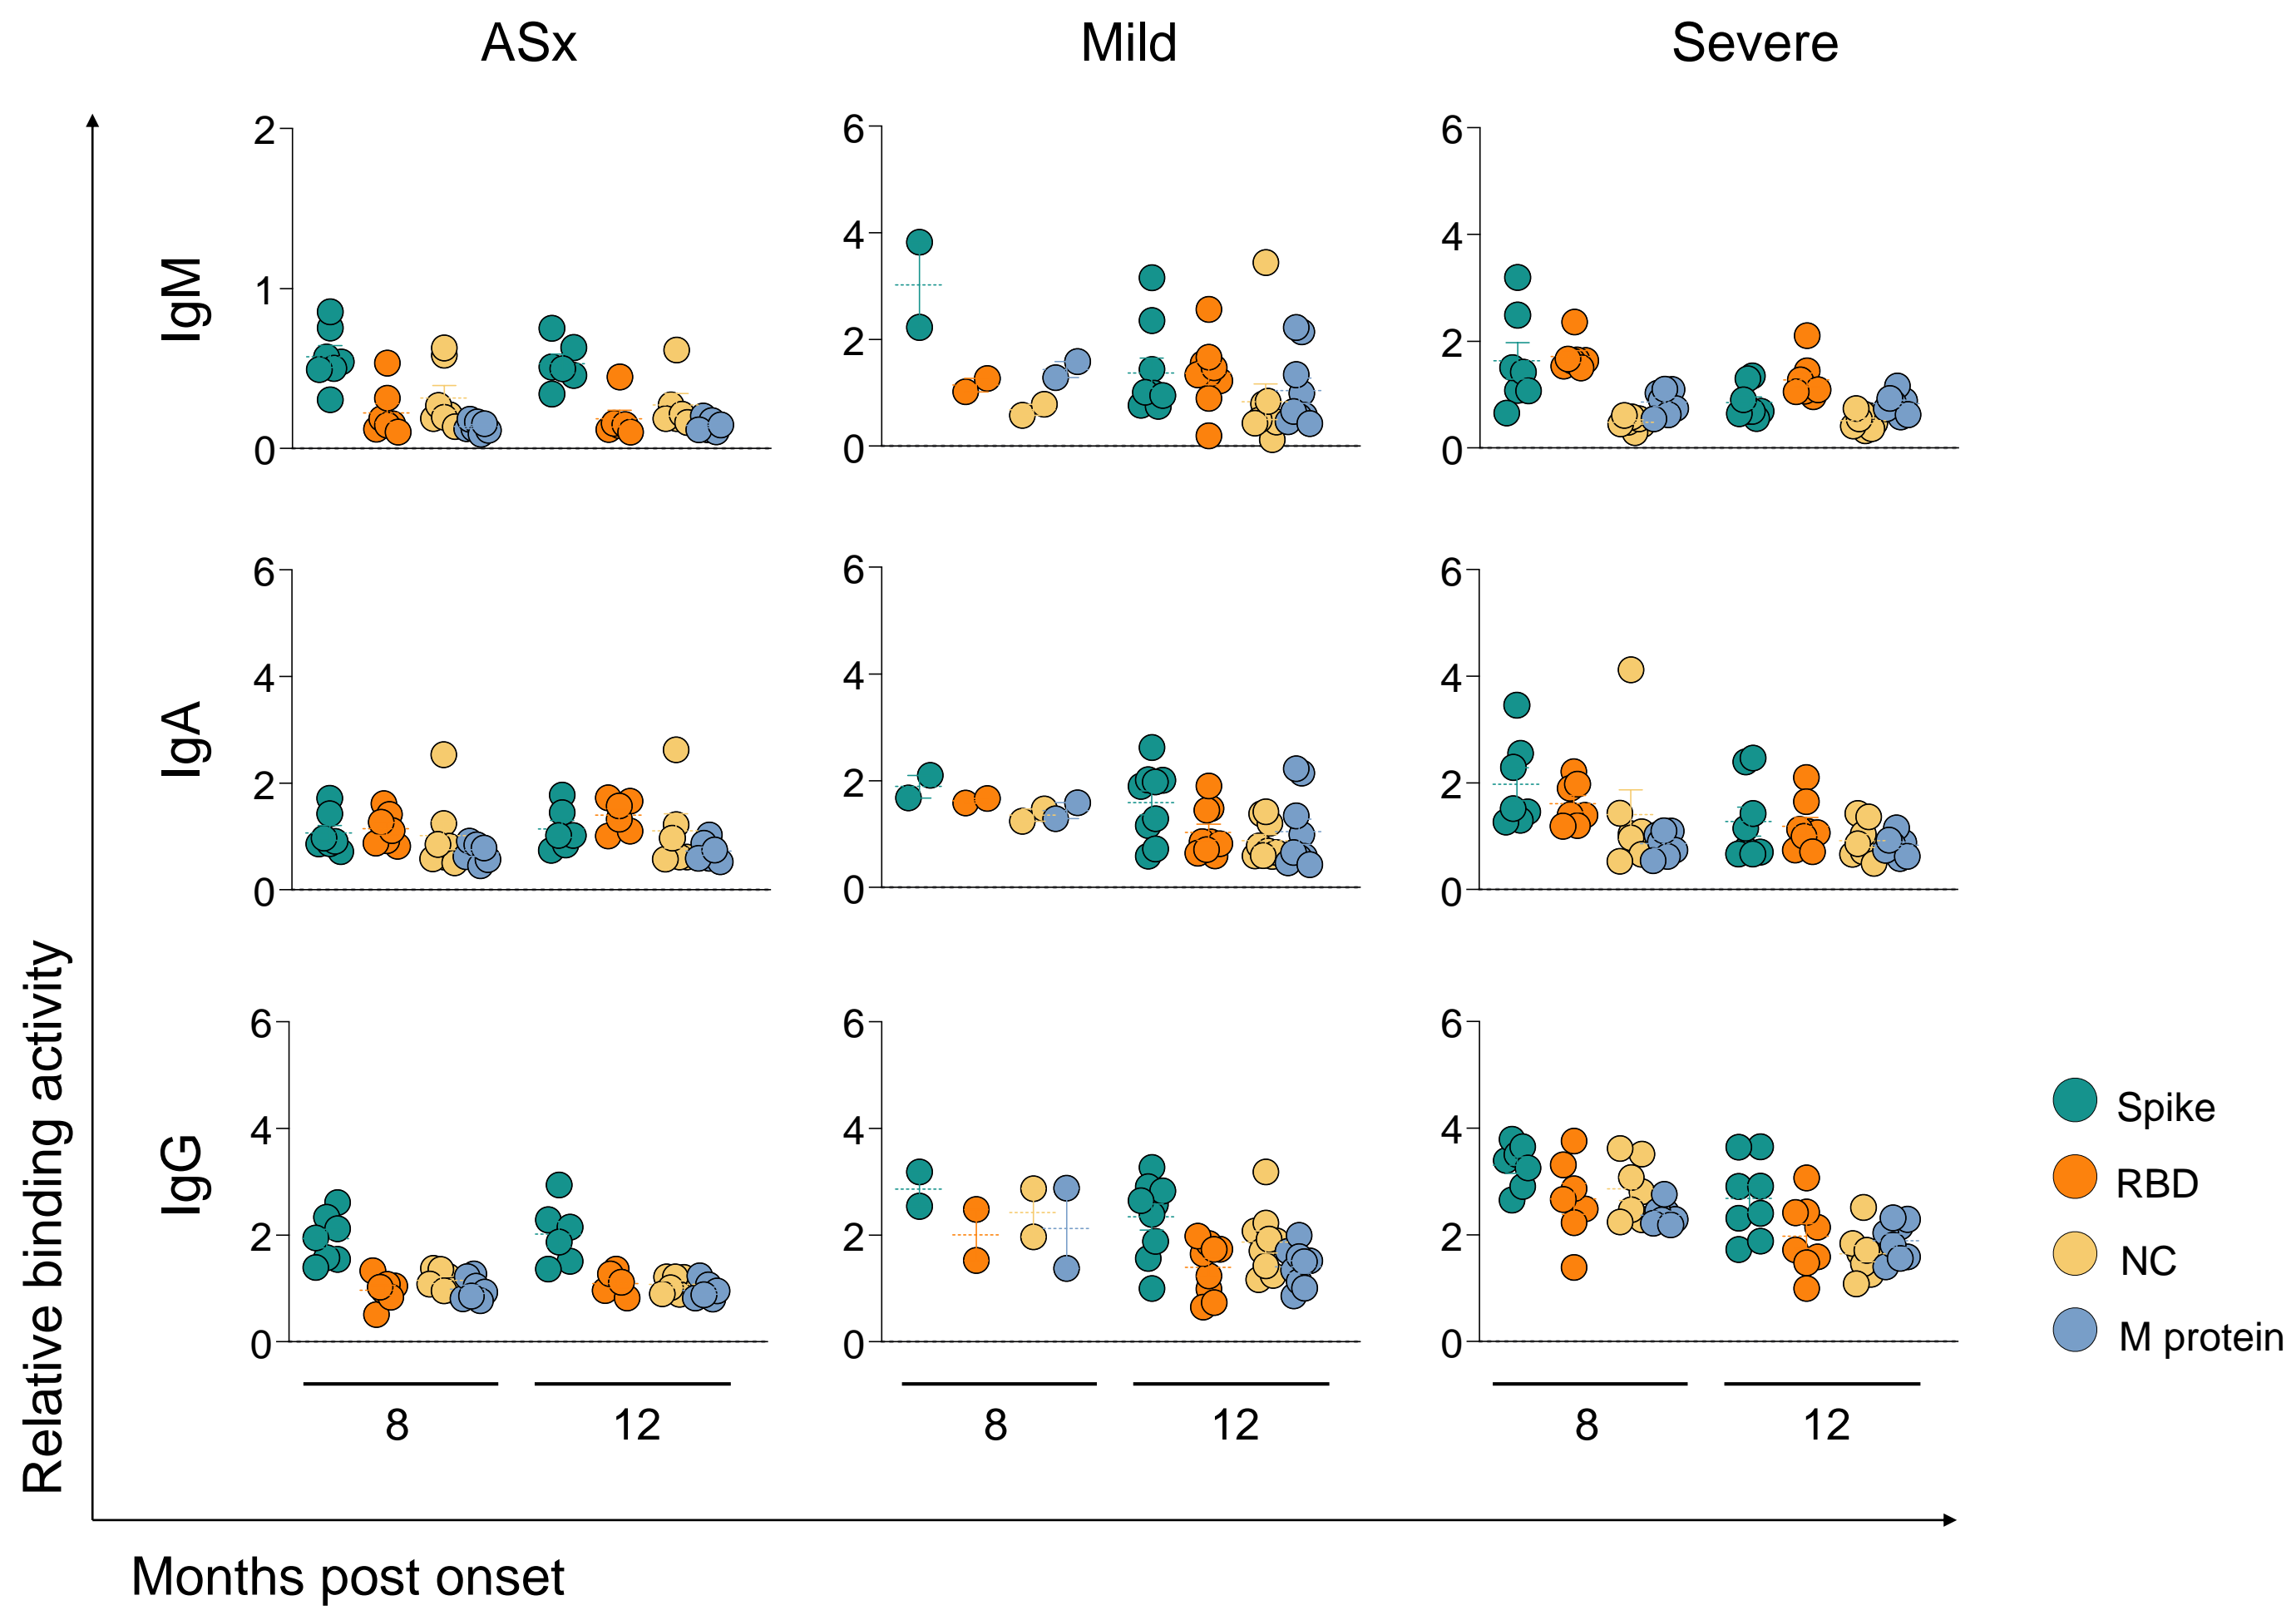

# Supplementary Figure S4

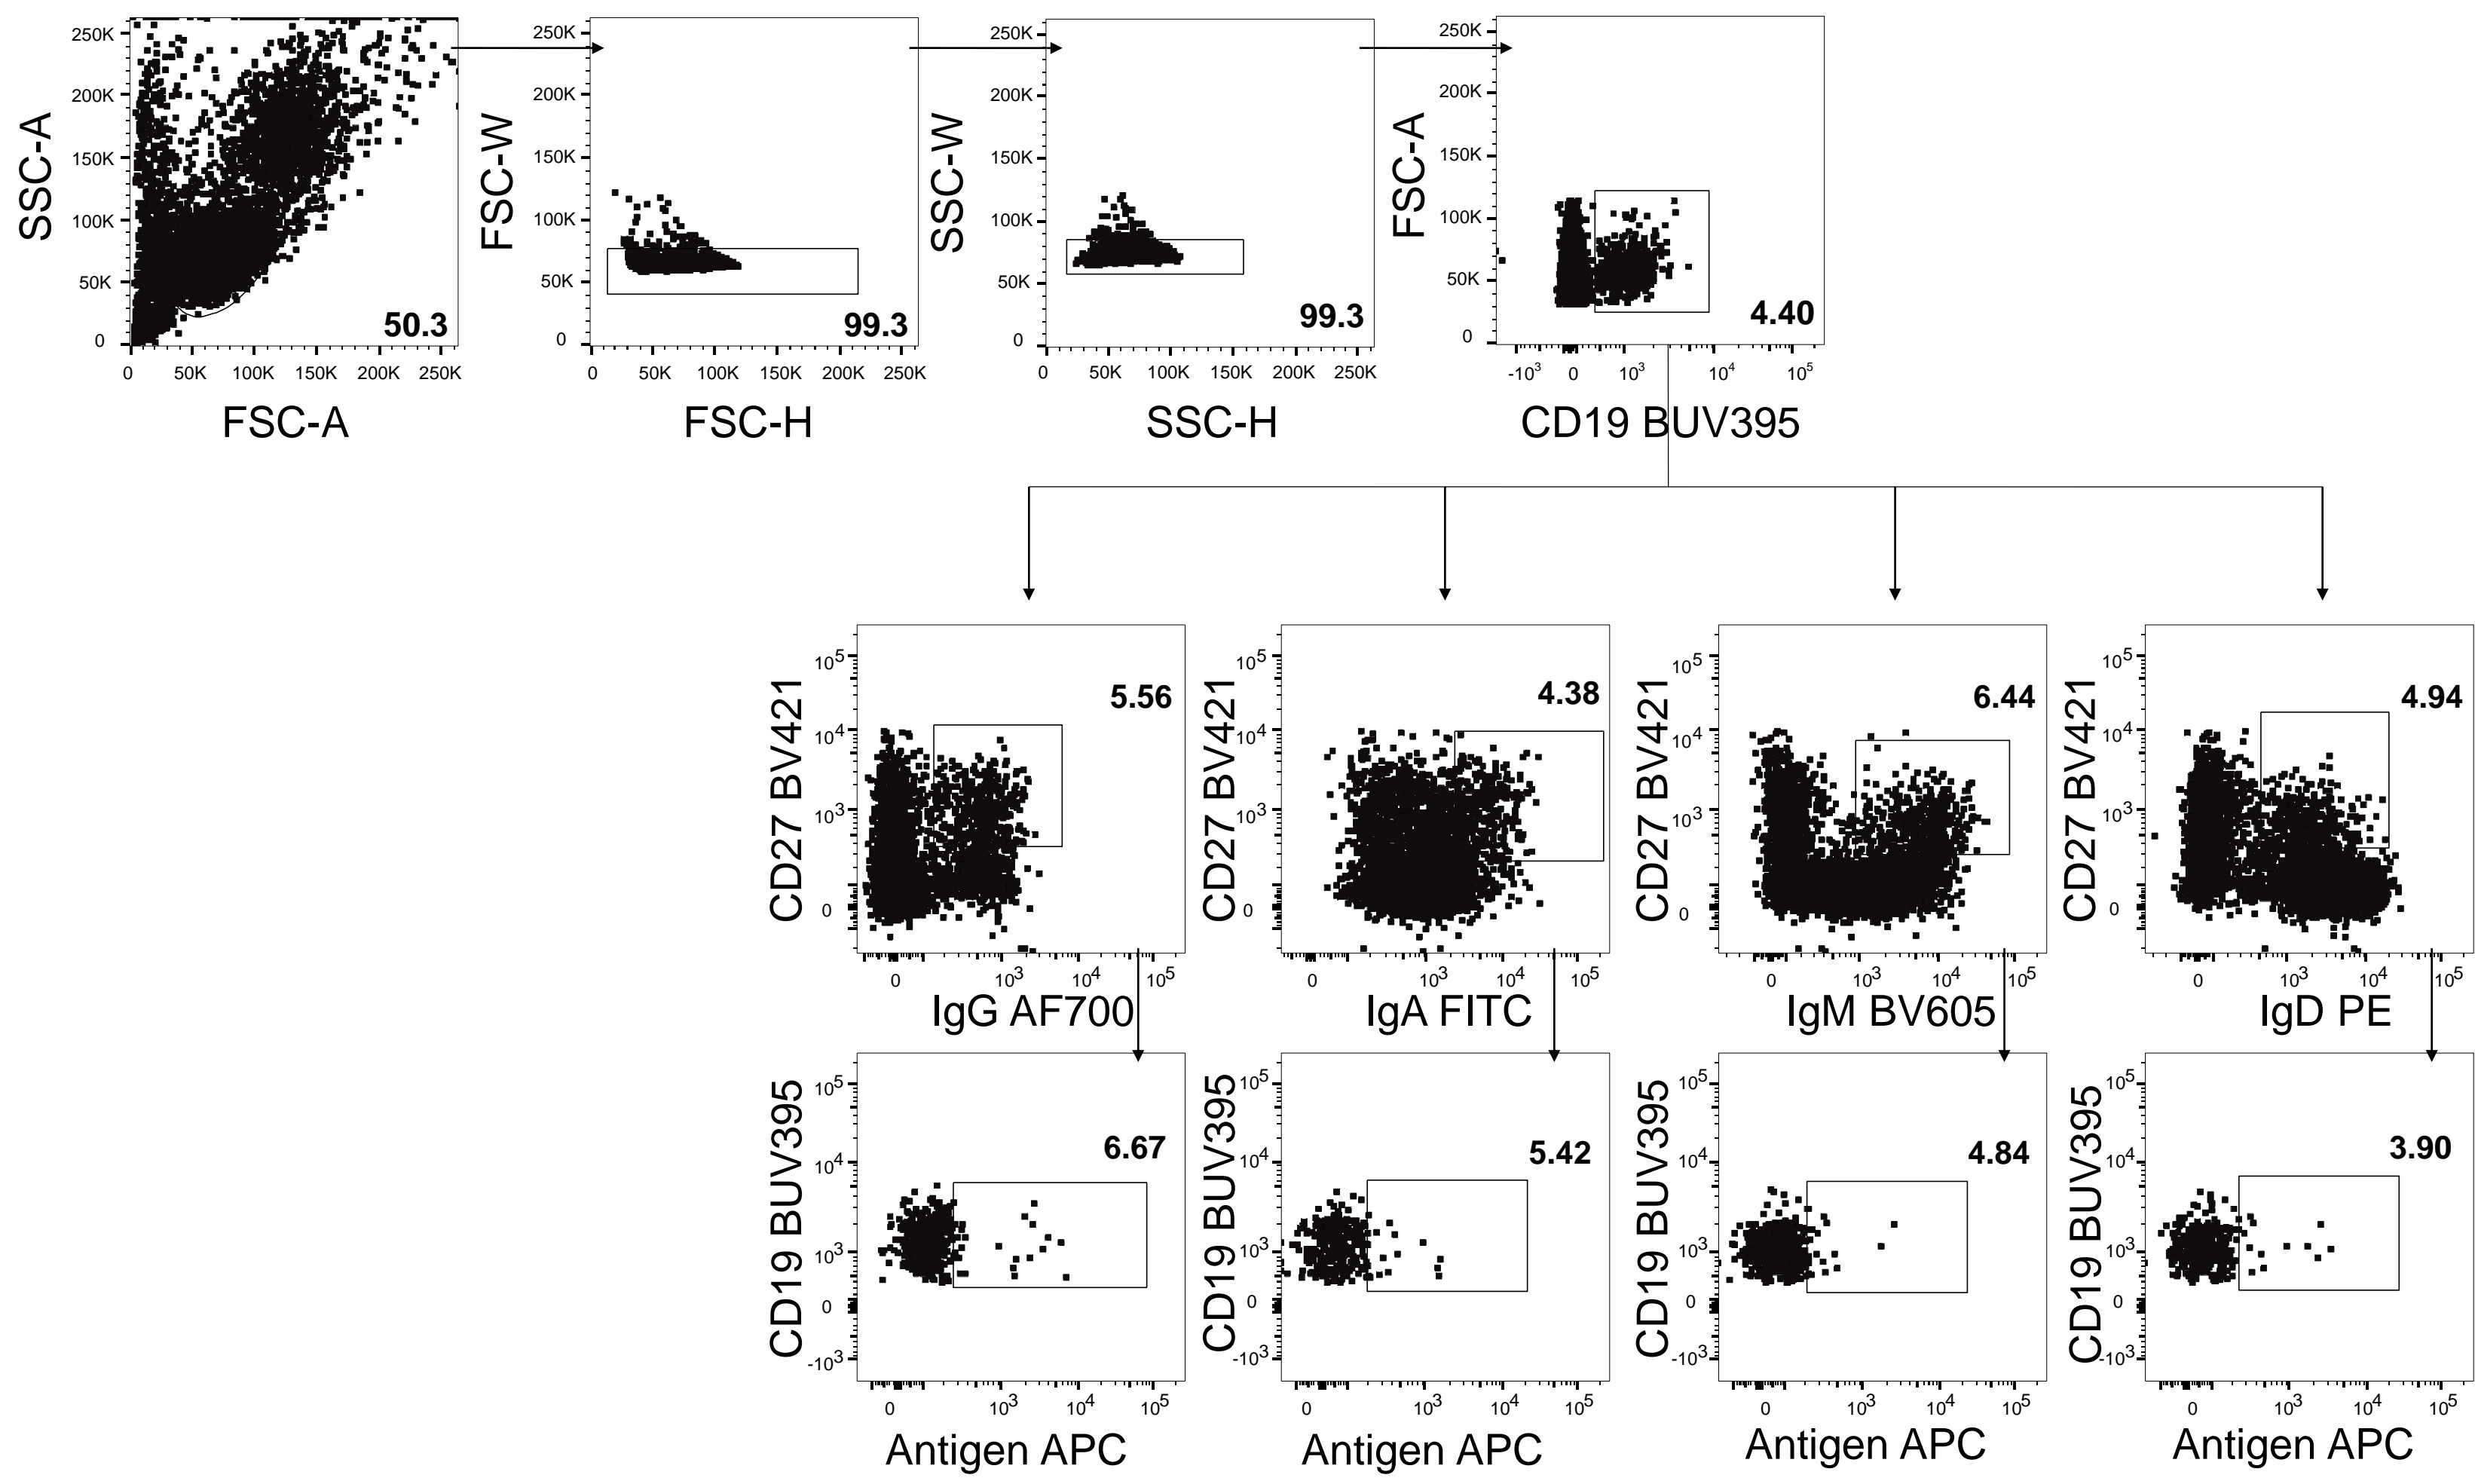

# Supplementary Figure S5

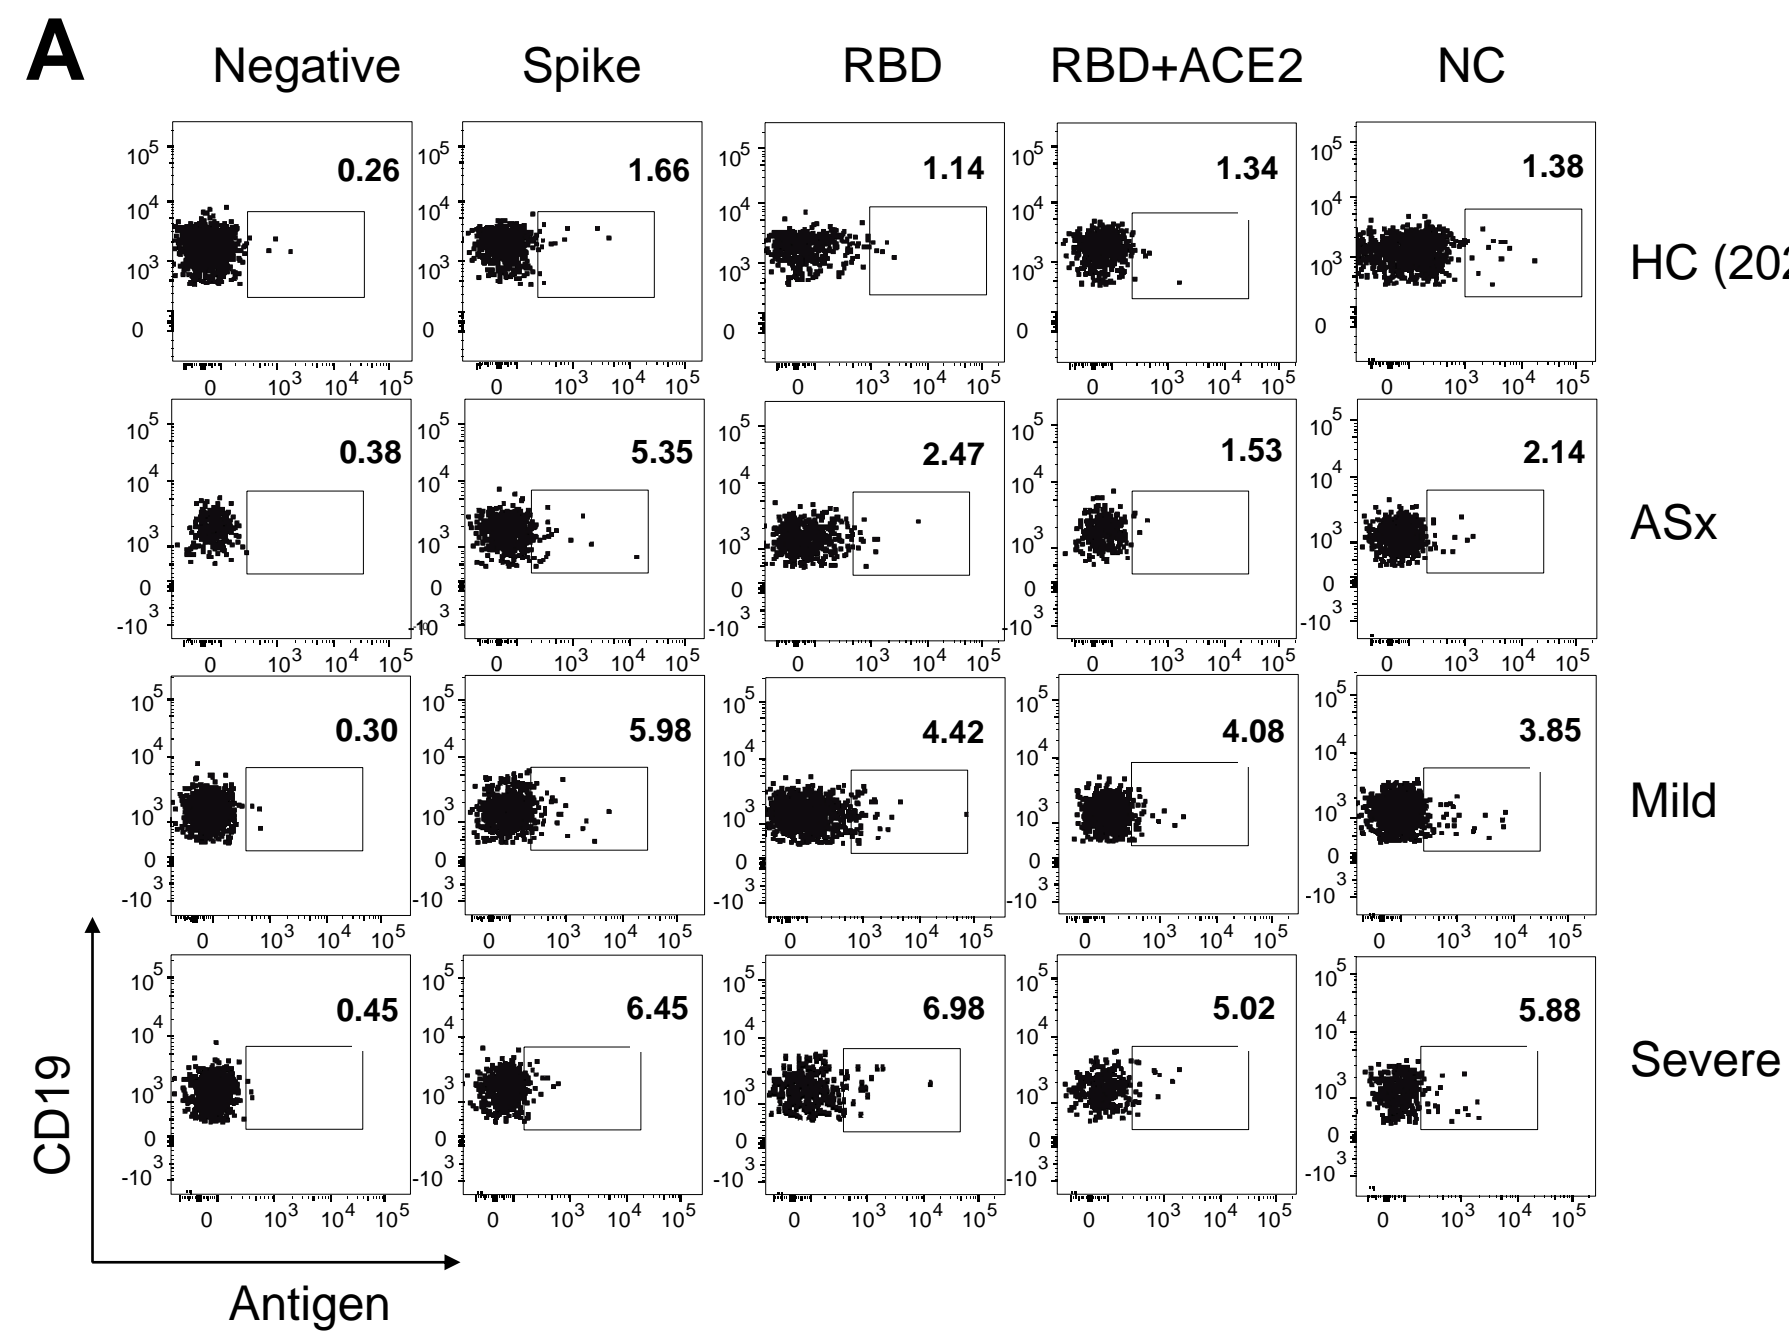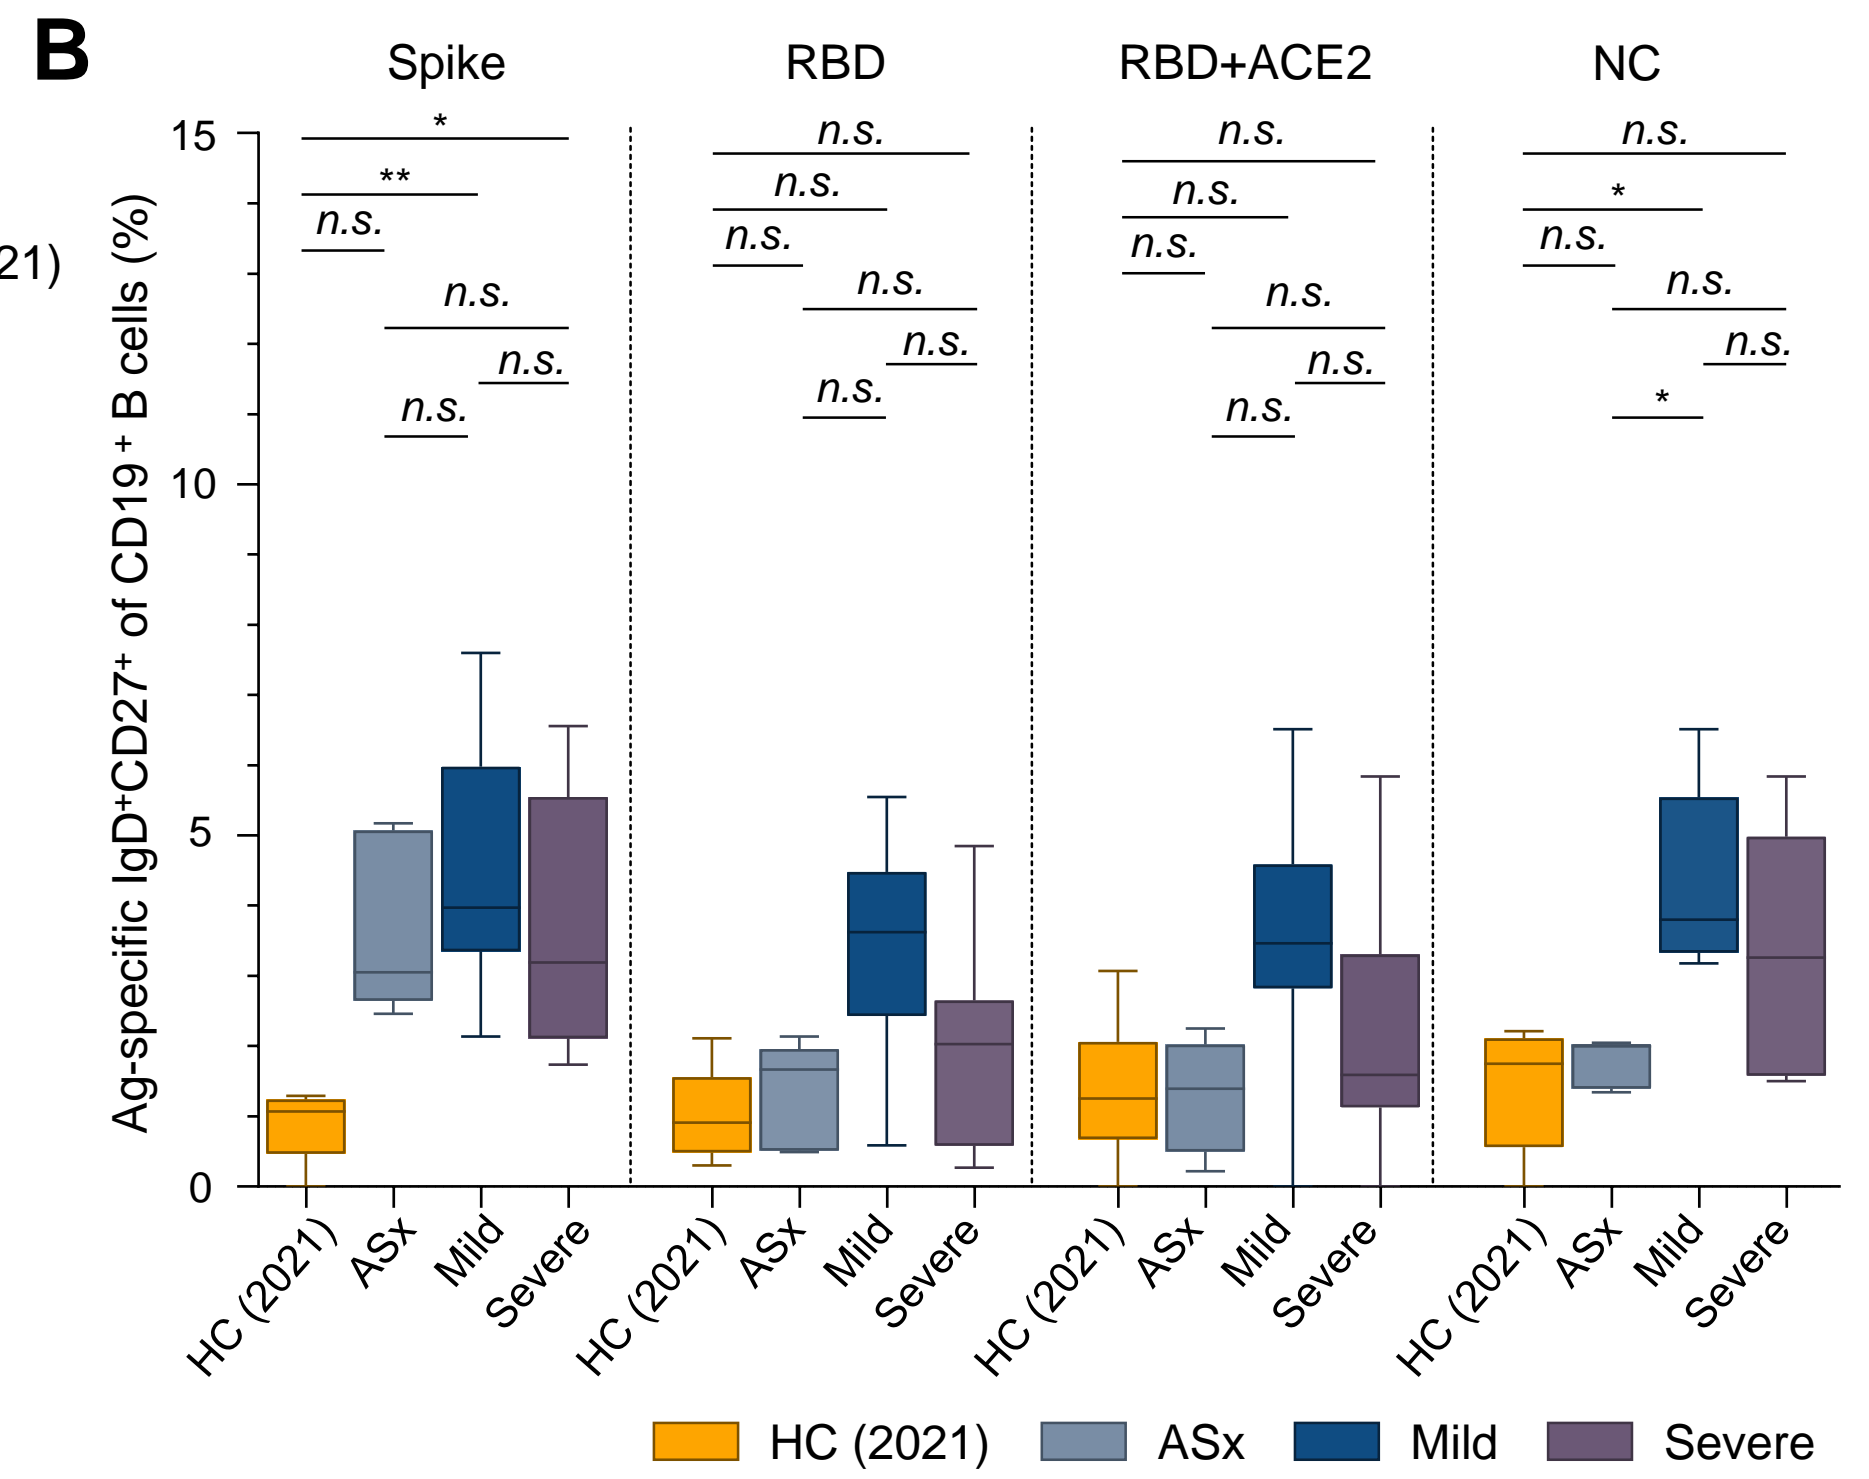

# Supplementary Figure S6

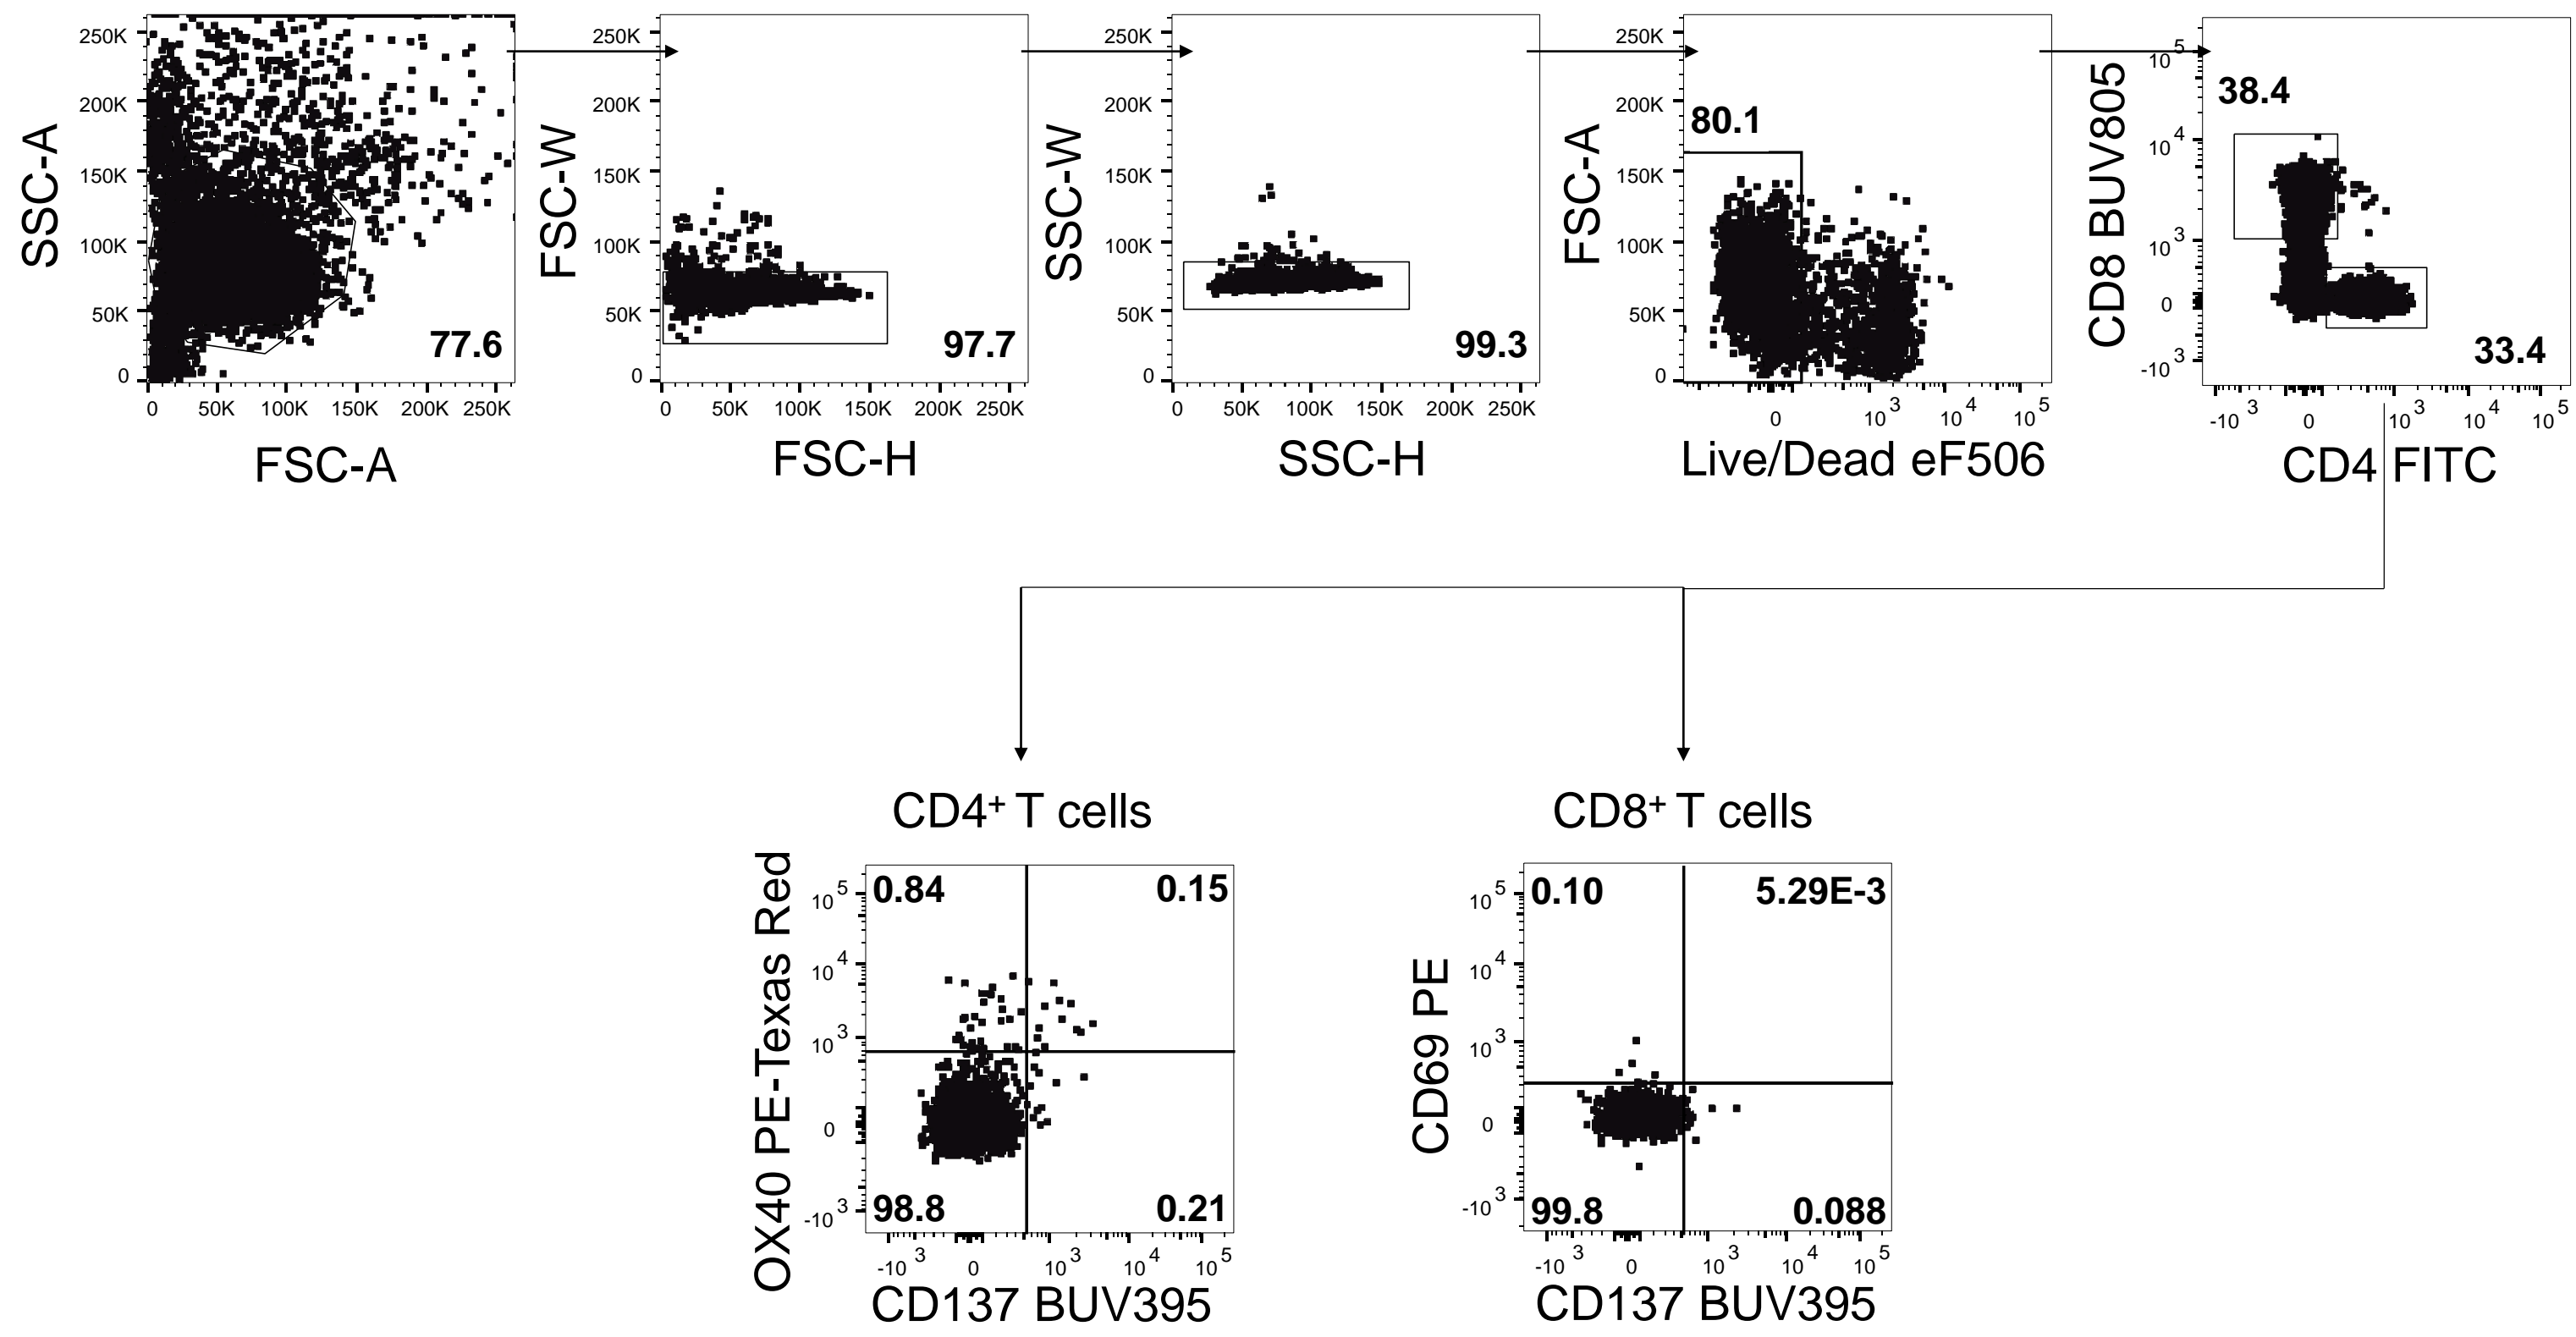

Supplement: DataSheet_1.pdf [file DataSheet_1.pdf]
